# Supplementary material for: Effect of atorvastatin on glycaemia progression in patients with diabetes: an analysis from the Collaborative Atorvastatin in Diabetes Trial (CARDS)
Source: Springer Nature journal article supplement (doi:10.1007/s00125-015-3802-6), 2015-11-17
Supplement: MOESM1 [file 8093414]

## Electronic Supplementary Material (ESM)

**ESM Table 1. Baseline characteristics by treatment group**

|                                    | Placebo <sup>a</sup><br>(n = 1361) | Atorvastatin <sup>a</sup><br>(n = 1378) | Age, sex adjusted P-<br>value <sup>b</sup> |
|------------------------------------|------------------------------------|-----------------------------------------|--------------------------------------------|
| <b>Characteristic</b>              |                                    |                                         |                                            |
| Female                             | 32.1 (1.3)                         | 32.0 (1.3)                              | 0.942                                      |
| Age, years                         | 61.8 (8.0)                         | 61.5 (8.2)                              | 0.442                                      |
| Diabetes duration, years           | 7.7 (6.3)                          | 7.9 (6.4)                               | 0.394                                      |
| HDL-c, mmol/L                      | 1.41 (0.34)                        | 1.39 (0.32)                             | 0.193                                      |
| Triacylglycerol, mmol/L            | 1.94 (1.08)                        | 1.95 (1.09)                             | 0.846                                      |
| LDL-c, mmol/L                      | 3.02 (0.7)                         | 3.04 (0.72)                             | 0.381                                      |
| HbA <sub>1c</sub> , %              | 7.81 (1.39)                        | 7.86 (1.41)                             | 0.355                                      |
| HbA <sub>1c</sub> , mmol/mol       | 61.8 (15.2)                        | 62.4 (15.4)                             | 0.355                                      |
| BMI, kg/m <sup>2</sup>             | 28.9 (3.5)                         | 28.7 (3.6)                              | 0.129                                      |
| Metabolic syndrome                 | 54.6 (1.4)                         | 54.6 (1.3)                              | 0.914                                      |
| <i>Anti-glycaemic drug therapy</i> |                                    |                                         |                                            |
| None                               | 16.1                               | 15.0                                    | -                                          |
| Metformin                          | 13.7                               | 13.6                                    | -                                          |
| Sulphonylurea                      | 22.3                               | 21.5                                    | -                                          |
| Other monotherapy <sup>c</sup>     | 0.3                                | 0.4                                     | -                                          |
| 2 orals                            | 26.3                               | 27.1                                    | -                                          |
| 3 orals                            | 2.4                                | 2.4                                     | -                                          |
| Insulin                            | 18.9                               | 20.2                                    | 0.956 <sup>d</sup>                         |

<sup>a</sup> Mean (standard deviation) and percent (standard error of percent) are shown for continuous and binary variables respectively. <sup>b</sup> P-value from logistic regression of treatment arm adjusted by baseline age and sex where relevant.

<sup>c</sup> Other monotherapy consists mainly of alpha glucosidase inhibitors (111 of 131) with only 12 and 8 patients reporting thiazolidinediones and aldose reductase inhibitors respectively. <sup>d</sup> P-value for 7 level categorical variable.
